# Supplementary material
Source: bioRxiv or medRxiv preprint supplement (https://medrxiv.org/highwire/filestream/93942/field_highwire_adjunct_files/1/2020.08.19.20178475-2.pdf)
Supplement: Supplementary file [file 2020.08.19.20178475-2.pdf]

## STROBE statement: Reporting guidelines checklist for cohort, case-control and cross-sectional studies

| SECTION                   | ITEM NUMBER | CHECKLIST ITEM                                                                                                                                                                                                                                                                                                                                                                                                                             | REPORTED ON PAGE NUMBER: |
|---------------------------|-------------|--------------------------------------------------------------------------------------------------------------------------------------------------------------------------------------------------------------------------------------------------------------------------------------------------------------------------------------------------------------------------------------------------------------------------------------------|--------------------------|
| <b>TITLE AND ABSTRACT</b> |             |                                                                                                                                                                                                                                                                                                                                                                                                                                            |                          |
|                           | 1a          | Indicate the study's design with a commonly used term in the title or the abstract                                                                                                                                                                                                                                                                                                                                                         | 1                        |
|                           | 1b          | Provide in the abstract an informative and balanced summary of what was done and what was found                                                                                                                                                                                                                                                                                                                                            | 2                        |
| <b>INTRODUCTION</b>       |             |                                                                                                                                                                                                                                                                                                                                                                                                                                            |                          |
| Background and objectives | 2           | Explain the scientific background and rationale for the investigation being reported                                                                                                                                                                                                                                                                                                                                                       | 2                        |
|                           | 3           | State specific objectives, including any pre-specified hypotheses                                                                                                                                                                                                                                                                                                                                                                          | 3                        |
| <b>METHODS</b>            |             |                                                                                                                                                                                                                                                                                                                                                                                                                                            |                          |
| Study design              | 4           | Present key elements of study design early in the paper                                                                                                                                                                                                                                                                                                                                                                                    | 3 and 4                  |
| Setting                   | 5           | Describe the setting, locations, and relevant dates, including periods of recruitment, exposure, follow-up, and data collection                                                                                                                                                                                                                                                                                                            | 4                        |
| Participants              | 6a          | Cohort study—Give the eligibility criteria, and the sources and methods of selection of participants. Describe methods of follow-up<br>Case-control study—Give the eligibility criteria, and the sources and methods of case ascertainment and control selection. Give the rationale for the choice of cases and controls<br>Cross-sectional study—Give the eligibility criteria, and the sources and methods of selection of participants | 4                        |
|                           | 6b          | Cohort study—For matched studies, give matching criteria and number of exposed and unexposed<br>Case-control study—For matched studies, give matching criteria and the number of controls per case<br>Variables                                                                                                                                                                                                                            | -                        |
| Variables                 | 7           | Clearly define all outcomes, exposures, predictors, potential confounders, and effect modifiers. Give diagnostic criteria, if applicable                                                                                                                                                                                                                                                                                                   | 5, 6 and 7               |
| Data sources/measurements | 8*          | For each variable of interest, give sources of data and details of methods of assessment (measurement). Describe comparability of assessment methods if there is more than one group.                                                                                                                                                                                                                                                      | 5, 6 and 7               |

| SECTION                | ITEM NUMBER | CHECKLIST ITEM                                                                                                                                                                                                                                                                | REPORTED ON PAGE NUMBER: |
|------------------------|-------------|-------------------------------------------------------------------------------------------------------------------------------------------------------------------------------------------------------------------------------------------------------------------------------|--------------------------|
| Bias                   | 9           | Describe any efforts to address potential sources of bias.                                                                                                                                                                                                                    | -                        |
| Study size             | 10          | Explain how the study size was arrived at                                                                                                                                                                                                                                     | -                        |
| Quantitative variables | 11          | Explain how quantitative variables were handled in the analyses. If applicable, describe which groupings were chosen and why.                                                                                                                                                 | 6 and 7                  |
| Statistical methods    | 12a         | Describe all statistical methods, including those used to control for confounding                                                                                                                                                                                             | 6 and 7                  |
|                        | 12b         | Describe any methods used to examine subgroups and interactions                                                                                                                                                                                                               | 7                        |
|                        | 12c         | Explain how missing data were addressed                                                                                                                                                                                                                                       | -                        |
|                        | 12d         | Cohort study—If applicable, explain how loss to follow-up was addressed<br>Case-control study—If applicable, explain how matching of cases and controls was addressed<br>Cross-sectional study—If applicable, describe analytical methods taking account of sampling strategy | -                        |
|                        | 12e         | Describe any sensitivity analyses                                                                                                                                                                                                                                             | -                        |
| <b>RESULTS</b>         |             |                                                                                                                                                                                                                                                                               |                          |
| Participants           | 13a         | Report numbers of individuals at each stage of study—eg numbers potentially eligible, examined for eligibility, confirmed eligible, included in the study, completing follow-up, and analysed                                                                                 | 9                        |
|                        | 13b         | Give reasons for non-participation at each stage                                                                                                                                                                                                                              | -                        |
|                        | 13c         | Consider use of a flow diagram                                                                                                                                                                                                                                                | -                        |
| Descriptive Data       | 14a         | Give characteristics of study participants (eg demographic, clinical, social) and information on exposures and potential confounders                                                                                                                                          | 9                        |
|                        | 14b         | Indicate number of participants with missing data for each variable of interest                                                                                                                                                                                               | -                        |
|                        | 14c         | Cohort study—Summarise follow-up time (eg, average and total amount)                                                                                                                                                                                                          | -                        |
| Outcome Data           | 15*         | Cohort study—Report numbers of outcome events or summary measures over time<br>Case-control study—Report numbers in each exposure category, or summary measures of exposure<br>Cross-sectional study—Report numbers of outcome events or summary measures                     | 10, 11 and 12            |
| Main Results           | 16a         | Give unadjusted estimates and, if applicable, confounder-adjusted estimates and their precision (e.g. 95% confidence interval). Make clear which confounders were adjusted for and why they were included                                                                     | -                        |
|                        | 16b         | Report category boundaries when continuous variables were categorized                                                                                                                                                                                                         | -                        |

| SECTION           | ITEM NUMBER | CHECKLIST ITEM                                                                                                                                                             | REPORTED ON PAGE NUMBER: |
|-------------------|-------------|----------------------------------------------------------------------------------------------------------------------------------------------------------------------------|--------------------------|
|                   | 16c         | If relevant, consider translating estimates of relative risk into absolute risk for a meaningful time period                                                               | -                        |
|                   | 16d         | Report results of any adjustments for multiple comparisons                                                                                                                 | 11                       |
| Other Analyses    | 17a         | Report other analyses done—e.g. analyses of subgroups and interactions, and sensitivity analyses                                                                           | -                        |
|                   | 17b         | If numerous genetic exposures (genetic variants) were examined, summarize results from all analyses undertaken                                                             | -                        |
|                   | 17c         | If detailed results are available elsewhere, state how they can be accessed                                                                                                | 10, 11, 12 and 13        |
| <b>DISCUSSION</b> |             |                                                                                                                                                                            |                          |
| Key Results       | 18          | Summarise key results with reference to study objectives                                                                                                                   | 14                       |
| Limitations       | 19          | Discuss limitations of the study, taking into account sources of potential bias or imprecision. Discuss both direction and magnitude of any potential bias                 | 16 and 17                |
| Interpretation    | 20          | Give a cautious overall interpretation of results considering objectives, limitations, multiplicity of analyses, results from similar studies, and other relevant evidence | 14, 15, 16 and 17        |
| Generalisability  | 21          | Discuss the generalisability (external validity) of the study results<br>Other information                                                                                 | 17                       |
| <b>FUNDING</b>    |             |                                                                                                                                                                            |                          |
|                   | 22          | Give the source of funding and the role of the funders for the present study and, if applicable, for the original study on which the present article is based              | 1                        |
|                   |             |                                                                                                                                                                            |                          |

\*Give information separately for cases and controls in case-control studies and, if applicable, for exposed and unexposed groups in cohort and cross-sectional studies.
